# Supplementary material for: New scaling relations to compute atom-in-material polarizabilities and dispersion coefficients: part 2. Linear-scaling computational algorithms and parallelization
Source: RSC Adv. 2019 Oct 17;9(57):33310–36. doi: 10.1039/c9ra01983a (PMC9073276; doi:10.1039/c9ra01983a)
Supplement: RA-009-C9RA01983A-s008 [file RA-009-C9RA01983A-s008.xlsx]

## Sheet: Romberg_integration
The following table gives the Romberg integration coefficients for Romberg order (G,G) which has 2^G non-trivial integration points.
These are used to integrate the Casimir-Polder integral over the imfreq points (i.e., u values).
Note that the u=0 point corresponds to infinite frequency and is not included, because it contributes nothing to the Casimir-Polder integral.
		u values -->	1	2	3	4	5	6	7	8	9	10	11	12	13	14	15	16	17	18	19	20	21	22	23	24	25	26	27	28	29	30	31	32
Rhomberg order (G,G)	Nimfreqs
1	2		0.666667	0.166667
2	4		0.355556	0.133333	0.355556	0.0777778
3	8		0.1806	0.0620811	0.1806	0.0768959	0.1806	0.0620811	0.1806	0.0382716
4	16		0.0906539	0.0304541	0.0906539	0.0383553	0.0906539	0.0304541	0.0906539	0.0381201	0.0906539	0.0304541	0.0906539	0.0383553	0.0906539	0.0304541	0.0906539	0.0190608
5	32		0.0453713	0.0151533	0.0453713	0.0191666	0.0453713	0.0151533	0.0453713	0.0190412	0.0453713	0.0151533	0.0453713	0.0191666	0.0453713	0.0151533	0.0453713	0.0190421	0.0453713	0.0151533	0.0453713	0.0191666	0.0453713	0.0151533	0.0453713	0.0190412	0.0453713	0.0151533	0.0453713	0.0191666	0.0453713	0.0151533	0.0453713	0.00952106

## Sheet: Richardson_extrapolation
The following table gives the Richardson extrapolation coefficients, C((K+1),(s+1))
Note that the screening increment size is 2^-s giving 2^s screening increments.
The number of extrapolation steps is K, with s = 0, 1, …K.
	S+1 -->	1	2	3	4	5	6	7	8
K+1
1		1
2		-1	2
3		0.333333	-2	2.66667
4		-0.047619	0.666667	-2.66667	3.04762
5		0.0031746	-0.0952381	0.888889	-3.04762	3.25079
6		-0.000102407	0.00634921	-0.126984	1.01587	-3.25079	3.35566
7		1.6255e-06	-0.000204813	0.00846561	-0.145125	1.0836	-3.35566	3.40892
8		-1.27992e-08	3.251e-06	-0.000273084	0.00967498	-0.1548	1.11855	-3.40892	3.43576
